# Supplementary material
Source: PubMed Central journal article supplement (PMC4106330)
Supplement: supp_M114.574822_jbc.M114.574822-1.pdf [file supp_M114.574822_jbc.M114.574822-1.pdf]

## Supplemental Information

### Cross-Linking Evidence for Multiple Interactions of the PsbP and PsbQ Proteins in a Higher Plant Photosystem II Supercomplex

Kunio Ido<sup>a</sup>, Jon Nield<sup>b</sup>, Yoichiro Fukao<sup>c</sup>, Fumihiko Sato<sup>a</sup>, and Kentaro Ifuku<sup>a,d</sup>.

<sup>a</sup>Graduate School of Biostudies, Kyoto University, Sakyo-ku, Kyoto 606-8502, Japan; <sup>b</sup>School of Biological and Chemical Sciences, Queen Mary University of London, London E1 4NS, United Kingdom; <sup>c</sup>Plant Global Educational Project, Nara Institute of Science and Technology, Ikoma, 630-0192 Japan; <sup>d</sup>Japan Science and Technology Agency, PRESTO, 4-1-8 Honcho Kawaguchi, Saitama 332-0012, Japan

**Table S1:** Peptide list for the band P-1 identified by the LC-MS analysis.

**Table S2:** Peptide list for the band P-2 identified by the LC-MS analysis.

**Table S3:** Peptide list for the band P-3 identified by the LC-MS analysis.

**Table S4:** Peptide list for the band P-4 identified by the LC-MS analysis.

**Table S5:** Peptide list for the band Q-3 identified by the LC-MS analysis.

**Table S6:** Peptide list for the band Q-4 identified by the LC-MS analysis.

**Table S7:** The lists of detected product ions derived from peptides that were predicted to be cross-linked between PsbP and PsbR.

**Table S8:** The lists of detected product ions derived from peptides that were predicted to be cross-linked between PsbP and CP26.

**Table S1:** Peptide list for the band P-1 identified by the LC-MS analysis

| Index | scan# | charge | score | pp   | pp2  | pp_tag | RT_conf | RT(obs) | RT(pred) | PA        | m/z      | MW(obs)   | MW        | delta   | miss | peptide+modif             | protein |
|-------|-------|--------|-------|------|------|--------|---------|---------|----------|-----------|----------|-----------|-----------|---------|------|---------------------------|---------|
| 1483  | 1047  | 2      | 88    | 19.6 | 13.8 | 18.2   | 0.6746  | 17.13   | 18.11    | 178832.06 | 740.8597 | 1480.7122 | 1480.7101 | 0.0022  | 0    | SPTGEVIFGGETMR            | CP43    |
| 1488  | 930   | 2      | 71    | 16.1 | 12.4 | 10.7   | 0.3711  | 15.46   | 18.11    | 12356.65  | 748.8571 | 1496.7068 | 1496.705  | 0.0019  | 0    | SPTGEVIFGGETMR OxIM(13)   | CP43    |
| 1446  | 754   | 2      | 51    | 24.3 | 10.2 | 13.6   | 0.9866  | 12.3    | 12.35    | 1235223.9 | 713.887  | 1426.7666 | 1426.7649 | 0.0018  | 0    | LGANVGSAAQGPTGLGK         | CP43    |
| 953   | 389   | 1      | 38    | 10   | 18.8 | 5.5    | 0.3931  | 7.02    | 10.39    | 11763.57  | 764.3934 | 764.3934  | 764.3937  | -0.0003 | 0    | AAAAGFEK                  | CP43    |
| 954   | 422   | 1      | 33    | 10.8 | 16.9 | 5.5    | 0.3931  | 7.02    | 10.39    | 11763.57  | 764.3945 | 764.3945  | 764.3937  | 0.0007  | 0    | AAAAGFEK                  | CP43    |
| 1573  | 1238  | 2      | 89    | 16.1 | 11.1 | 10.3   | 0.4356  | 20.11   | 23.55    | 848704.73 | 910.449  | 1819.8908 | 1819.8895 | 0.0013  | 1    | GIDRDFEPVLSMTPLN OxIM(12) | CP43    |
| 1072  | 1164  | 2      | 82    | 11.6 | 15.7 | 9.1    | 0.6592  | 18.89   | 17.87    | 228372.02 | 491.2798 | 981.5523  | 981.5516  | 0.0007  | 0    | APWLEPLR                  | CP43    |
| 1163  | 774   | 2      | 26    | 18.4 | 6.6  | 9.9    | 0.7384  | 12.62   | 13.42    | 494264.82 | 536.2648 | 1071.5224 | 1071.5218 | 0.0006  | 0    | DIQPWQER                  | CP43    |
| 938   | 770   | 1      | 50    | 12.2 | 21   | 4.6    | 0.8747  | 12.65   | 13.03    | 94794.62  | 744.4631 | 744.4631  | 744.4614  | 0.0017  | 0    | LINLSGK                   | CP43    |
| 1289  | 676   | 2      | 23    | 11.8 | 7.1  | 4.9    | 0.4588  | 10.98   | 13.11    | 9913.74   | 614.3154 | 1227.6235 | 1227.6229 | 0.0006  | 1    | DIQPWQERR                 | CP43    |
| 59    | 1666  | 1      | 58    | 7.9  | 14.2 | 2.1    | 0.0966  | 26.88   | 8.88     | 67207.23  | 460.2545 | 460.2545  | 460.2514  | 0.0031  | 0    | GIDR                      | CP43    |
| 930   | 1060  | 1      | 31    | 6.2  | 11.1 | 2.3    | 0.4765  | 17.27   | 15.5     | 200745.72 | 736.3788 | 736.3788  | 736.3777  | 0.0011  | 0    | FWDLR                     | CP43    |
| 1596  | 1296  | 3      | 37    | 3.9  | 6.3  | 5.8    | 0.5668  | 20.99   | 23.19    | 369505.47 | 631.3396 | 1892.0042 | 1892.0219 | -0.0176 | 1    | *APWLEPLRGPNGLDLSR        | CP43    |

**Table S2:** Peptide list for the band P-2 identified by the LC-MS analysis

| Index | scan# | charge | score | pp   | pp2  | pp_tag | RT_conf | RT(obs) | RT(pred) | PA        | m/z      | MW(obs)   | MW        | delta   | miss | peptide+modif             | protein |
|-------|-------|--------|-------|------|------|--------|---------|---------|----------|-----------|----------|-----------|-----------|---------|------|---------------------------|---------|
| 1062  | 741   | 2      | 143   | 21.5 | 20.3 | 10.1   | 0.5185  | 12.26   | 12.95    | 447952.02 | 485.7641 | 970.5209  | 970.5204  | 0.0005  | 0    | DPDQAALLK                 | CP26    |
| 1063  | 743   | 1      | 33    | 15.1 | 9.8  | 7.3    | 0.5193  | 12.26   | 12.95    | 109155.25 | 970.5219 | 970.5219  | 970.5204  | 0.0015  | 0    | DPDQAALLK                 | CP26    |
| 1427  | 1191  | 2      | 33    | 9.8  | 6.2  | 9.1    | 0.518   | 19.62   | 18.89    | 70567.57  | 709.8929 | 1418.7785 | 1418.7791 | -0.0006 | 0    | LHPGGPFDPLGLAK            | CP26    |
| 1428  | 1193  | 3      | 54    | 10.4 | 11.2 | 15.3   | 0.5396  | 19.58   | 18.89    | 229904.81 | 473.5984 | 1418.7807 | 1418.7791 | 0.0016  | 0    | LHPGGPFDPLGLAK            | CP26    |
| 1472  | 1181  | 2      | 89    | 19.9 | 16.1 | 11.8   | 0.4813  | 19.44   | 18.64    | 193796.92 | 741.8465 | 1482.6857 | 1482.6834 | 0.0023  | 0    | FGANCGPEAVWFK             | CP26    |
| 1313  | 997   | 2      | 54    | 16.7 | 11.5 | 11.2   | 0.3144  | 16.46   | 17.62    | 1391716   | 624.3302 | 1247.6531 | 1247.6531 | 0       | 0    | YQAFELIHAR                | CP26    |
| 1577  | 1265  | 2      | 37    | 10.9 | 8    | 15.8   | 0.0138  | 20.75   | 25.98    | 118436.63 | 925.9523 | 1850.8973 | 1850.8928 | 0.0045  | 0    | WAMLGAAGCVIPEAFNK Oxim(3) | CP26    |
| 723   | 269   | 1      | 67    | 12.4 | 16.2 | 3.7    | 0.6648  | 4.91    | 4.4      | 20464.54  | 616.4026 | 616.4026  | 616.4028  | -0.0002 | 1    | VKEIK                     | CP26    |
| 724   | 300   | 1      | 64    | 13   | 16.5 | 3.7    | 0.6648  | 4.91    | 4.4      | 20464.54  | 616.4036 | 616.4036  | 616.4028  | 0.0008  | 1    | VKEIK                     | CP26    |
| 986   | 329   | 1      | 59    | 13.7 | 14.7 | 4.2    | 0.8887  | 5.46    | 5.62     | 53169.74  | 834.4376 | 834.4376  | 834.4356  | 0.002   | 1    | KPEDFAK                   | CP26    |
| 1524  | 1313  | 2      | 40    | 14.1 | 7.9  | 7.1    | 0.0088  | 21.52   | 27.84    | 39241.89  | 848.9509 | 1696.8945 | 1696.8905 | 0.004   | 0    | TGALLLDGNTLNLYFGK         | CP26    |
| 723   | 269   | 1      | 40    | 9.6  | 13.1 | 3.7    | 0.4877  | 4.91    | 4.06     | 20464.54  | 616.4026 | 616.4026  | 616.4028  | -0.0002 | 1    | IEKVK                     | N/A     |
| 1669  | 1271  | 3      | 30    | 10.7 | 3.8  | 6.3    | 0.0115  | 20.82   | 26.42    | 105744.81 | 790.7662 | 2370.284  | 2370.2816 | 0.0024  | 1    | LHPGGPFDPLGLAKDPDQAALLK   | CP26    |

**Table S3:** Peptide list for the band P-3 identified by the LC-MS analysis

| Index | scan# | charge | score | pp   | pp2  | pp_tag | RT_conf | RT(obs) | RT(pred) | PA        | m/z       | MW(obs)   | MW        | delta  | miss | peptide+modif          | protein |
|-------|-------|--------|-------|------|------|--------|---------|---------|----------|-----------|-----------|-----------|-----------|--------|------|------------------------|---------|
| 1185  | 320   | 2      | 59    | 20.8 | 10.5 | 8.7    | 0       | 4.89    | 0        | 122623.51 | 531.2708  | 1061.5343 | 1061.5334 | 0.0009 | 1    | LRDGVDSGR              | PsbR    |
| 1186  | 289   | 2      | 47    | 10.9 | 10.5 | 3.6    | 0       | 4.8     | 0        | 275617.58 | 531.2718  | 1061.5363 | 1061.5334 | 0.0029 | 1    | LRDGVDSGR              | PsbR    |
| 1187  | 297   | 1      | 19    | 18.3 | 5.8  | 5.2    | 0       | 5       | 0        | 5088.55   | 1061.5372 | 1061.5372 | 1061.5334 | 0.0038 | 1    | LRDGVDSGR              | PsbR    |
| 1095  | 842   | 2      | 74    | 17.7 | 11.3 | 7.3    | 0       | 13.92   | 0        | 29584.61  | 478.2484  | 955.4895  | 955.4884  | 0.0012 | 0    | GVYQFVDK               | PsbR    |
| 1096  | 844   | 1      | 34    | 11.4 | 16.8 | 4.8    | 0       | 13.85   | 0        | 8046.28   | 955.4903  | 955.4903  | 955.4884  | 0.0019 | 0    | GVYQFVDK               | PsbR    |
| 1470  | 731   | 3      | 32    | 12.2 | 5.4  | 16.1   | 0       | 12.17   | 0        | 20967.73  | 476.9469  | 1428.8261 | 1428.8243 | 0.0018 | 2    | IKVDKPLGIGGMK OxiM(13) | PsbR    |
| 1302  | 616   | 2      | 39    | 18.5 | 6.2  | 8.2    | 0       | 9.86    | 0        | 357613.82 | 594.327   | 1187.6468 | 1187.6453 | 0.0015 | 1    | VDKPLGIGGMK OxiM(11)   | PsbR    |
| 1405  | 247   | 2      | 41    | 10.8 | 8.9  | 6.2    | 0       | 4.02    | 0        | 5405      | 652.3341  | 1303.6609 | 1303.6601 | 0.0009 | 2    | DGVDSSGRKPTGK          | PsbR    |

**Table S4:** Peptide list for the band P-4 identified by the LC-MS analysis

| Index | scan# | charge | score | pp   | pp2  | pp_tag | RT_conf | RT(obs) | RT(pred) | PA        | m/z      | MW(obs)   | MW        | delta   | miss | peptide+modif | protein |
|-------|-------|--------|-------|------|------|--------|---------|---------|----------|-----------|----------|-----------|-----------|---------|------|---------------|---------|
| 1515  | 1189  | 2      | 139   | 24.5 | 18.3 | 12.4   | 0.6734  | 19.34   | 20.51    | 68839.77  | 743.3467 | 1485.6862 | 1485.6856 | 0.0006  | 0    | FDSLEQLDEFSR  | PsbE    |
| 1239  | 1329  | 2      | 89    | 11.5 | 15.8 | 14.4   | 0.6603  | 21.36   | 20.16    | 123110.61 | 561.8125 | 1122.6177 | 1122.6154 | 0.0024  | 0    | SFADIITSIR    | PsbE    |
| 1088  | 1065  | 2      | 65    | 14.2 | 9    | 9.8    | 0.4571  | 17.18   | 14.9     | 1082437.6 | 477.7901 | 954.573   | 954.5731  | -0.0001 | 0    | QGIPLITGR     | PsbE    |
| 1089  | 1063  | 1      | 36    | 14.9 | 7.6  | 7.1    | 0.4502  | 17.23   | 14.9     | 96215.35  | 954.5731 | 954.5731  | 954.5731  | 0       | 0    | QGIPLITGR     | PsbE    |
| 1265  | 640   | 2      | 81    | 14.6 | 15.2 | 7.6    | 0.9887  | 10.4    | 10.44    | 15465.55  | 571.7604 | 1142.5136 | 1142.5113 | 0.0023  | 0    | PNEYFTESR     | PsbE    |

**Table S5:** Peptide list for the band Q-3 identified by the LC-MS analysis

| Index | scan# | charge | score | pp   | pp2  | pp_tag | RT_conf | RT(obs) | RT(pred) | PA        | m/z       | MW(obs)   | MW        | delta   | miss | peptide+modif                           | protein |
|-------|-------|--------|-------|------|------|--------|---------|---------|----------|-----------|-----------|-----------|-----------|---------|------|-----------------------------------------|---------|
| 1303  | 840   | 3      | 111   | 15.4 | 14.6 | 16.8   | 0.1984  | 13.69   | 16.98    | 4109.76   | 499.5737  | 1496.7065 | 1496.705  | 0.0015  | 0    | SPTGEVIFGGETMR OxiM(13)                 | CP43    |
| 1304  | 839   | 2      | 69    | 16   | 12.2 | 16.8   | 0.1851  | 13.44   | 16.98    | 244874    | 748.857   | 1496.7067 | 1496.705  | 0.0017  | 0    | SPTGEVIFGGETMR OxiM(13)                 | CP43    |
| 1241  | 1179  | 2      | 58    | 23.4 | 9.4  | 13.2   | 0.3279  | 19.52   | 22.51    | 9807.78   | 689.8323  | 1378.6573 | 1378.6559 | 0.0014  | 0    | DFEPVLSMTPLN OxiM(8)                    | CP43    |
| 1273  | 707   | 2      | 41    | 20.5 | 9.4  | 10.7   | 0.2975  | 11.6    | 9.71     | 7199.87   | 713.8873  | 1426.7673 | 1426.7649 | 0.0024  | 0    | LGANVGSAQGPTGLGK                        | CP43    |
| 905   | 651   | 2      | 59    | 17.1 | 11.7 | 9.8    | 0.6596  | 10.27   | 10.8     | 57769.27  | 464.7458  | 928.4844  | 928.4847  | -0.0003 | 0    | GPNGLDLSR                               | CP43    |
| 948   | 1015  | 2      | 123   | 11.6 | 16.3 | 9.1    | 0.9875  | 16.7    | 16.68    | 12589.58  | 491.2798  | 981.5524  | 981.5516  | 0.0007  | 0    | APWLEPLR                                | CP43    |
| 769   | 696   | 1      | 54    | 14   | 20.6 | 4.6    | 0.6741  | 11.07   | 10.57    | 11538.93  | 744.4622  | 744.4622  | 744.4614  | 0.0007  | 0    | LINLSGK                                 | CP43    |
| 1030  | 727   | 2      | 30    | 15.3 | 7.1  | 8.6    | 0.6833  | 11.54   | 11.06    | 102991.38 | 536.2645  | 1071.5217 | 1071.5218 | -0.0001 | 0    | DIQPWQER                                | CP43    |
| 791   | 371   | 1      | 44    | 7.9  | 17.6 | 4      | 0.5087  | 6.1     | 7.24     | 294.33    | 764.3952  | 764.3952  | 764.3937  | 0.0015  | 0    | AAAAGFEK                                | CP43    |
| 1383  | 1117  | 2      | 80    | 9.7  | 10.3 | 6.2    | 0.2034  | 18.21   | 23.85    | 147761.65 | 910.4489  | 1819.8906 | 1819.8895 | 0.0011  | 1    | GIDRDFEPVLSMTPLN OxiM(12)               | CP43    |
| 1589  | 1144  | 3      | 41    | 9.6  | 6.7  | 7.9    | 0.2113  | 18.68   | 24.25    | 171536.04 | 1107.5476 | 3320.6283 | 3320.6216 | 0.0067  | 0    | SAEYMTAPLGSLNSVGGVATEINAVNYVSPR OxiM(5) | CP43    |

**Table S6:** Peptide list for the bandQ-4 identified by the LC-MS analysis

| Index | scan# | charge | score | pp   | pp2  | pp_tag | RT_conf | RT(obs) | RT(pred) | PA        | m/z      | MW(obs)   | MW        | delta   | miss | peptide+modif     | protein |
|-------|-------|--------|-------|------|------|--------|---------|---------|----------|-----------|----------|-----------|-----------|---------|------|-------------------|---------|
| 1158  | 796   | 2      | 195   | 19   | 22.8 | 10.1   | 0.487   | 12.63   | 14.34    | 168644.39 | 485.7641 | 970.5209  | 970.5204  | 0.0005  | 0    | DPDQAALLK         | CP26    |
| 1159  | 801   | 1      | 31    | 14   | 8.9  | 4.8    | 0.4734  | 12.57   | 14.34    | 1816.49   | 970.521  | 970.521   | 970.5204  | 0.0006  | 0    | DPDQAALLK         | CP26    |
| 1160  | 832   | 2      | 12    | 19   | 5.8  | 10.1   | 0.5102  | 12.73   | 14.34    | 56588.05  | 485.765  | 970.5228  | 970.5204  | 0.0024  | 0    | DPDQAALLK         | CP26    |
| 1436  | 1177  | 3      | 66    | 12.8 | 11.5 | 18.5   | 0.4636  | 19.25   | 17.57    | 33085.85  | 473.5978 | 1418.779  | 1418.7791 | -0.0001 | 0    | LHPGGPFDPGLAK     | CP26    |
| 1437  | 1215  | 3      | 20    | 7.1  | 7.6  | 7.2    | 0.5941  | 18.76   | 17.57    | 1397492.6 | 473.5983 | 1418.7804 | 1418.7791 | 0.0014  | 0    | LHPGGPFDPGLAK     | CP26    |
| 1438  | 1179  | 2      | 30    | 7.5  | 5.6  | 1.7    | 0.5372  | 18.96   | 17.57    | 29727.6   | 709.894  | 1418.7807 | 1418.7791 | 0.0016  | 0    | LHPGGPFDPGLAK     | CP26    |
| 1511  | 1318  | 2      | 124   | 23.1 | 18   | 11.5   | 0.6393  | 21.15   | 22.43    | 1155430.1 | 848.9495 | 1696.8916 | 1696.8905 | 0.0012  | 0    | TGALLLDGNTLNLYFGK | CP26    |
| 1472  | 1186  | 2      | 102   | 18.5 | 17.3 | 10.7   | 0.4823  | 19.03   | 17.43    | 53228.27  | 741.8461 | 1482.6849 | 1482.6834 | 0.0014  | 0    | FGANCGPEAVWFK     | CP26    |
| 1289  | 889   | 2      | 75    | 24.2 | 12.1 | 8.1    | 0.8993  | 14.1    | 14.39    | 91890.21  | 576.2838 | 1151.5604 | 1151.5579 | 0.0025  | 0    | ITNGLDFEDK        | CP26    |
| 1544  | 1366  | 2      | 43    | 9.7  | 10.1 | 11.1   | 0.8118  | 22.02   | 21.42    | 36545.05  | 917.9539 | 1834.9004 | 1834.8979 | 0.0026  | 0    | WAMLGAAGCVIPEAFNK | CP26    |
| 1358  | 1013  | 2      | 46    | 11.2 | 10.8 | 10     | 0.7755  | 16.25   | 16.88    | 8775.65   | 624.3327 | 1247.6581 | 1247.6531 | 0.005   | 0    | YQAFELIHAR        | CP26    |

**Table S7:** The lists of detected product ions derived from peptides that were predicted to be cross-linked between PsbP and PsbR.

Index scan# charge score pp pp2 ppTag m/z MW(obs) MW delta miss Unique sequence + modifications  
 1998 372 +4 49 24.0 9.6 4.7 505.7815 2020.1043 2020.0934 0.0109 0 ✓ RD(\$1)GVDSSGRKPTGKGVY K(\$1)L

chainA :

| #  | b <sup>1+</sup> | b <sup>2+</sup> | b <sup>3+</sup> | b <sup>4+</sup> | b <sup>5+</sup> | b <sup>6+</sup> | b <sup>7+</sup> | b <sup>8+</sup> | b <sup>9+</sup> | b <sup>10+</sup> | b <sup>11+</sup> | b <sup>12+</sup> | seq | y <sup>1+</sup> | y <sup>2+</sup> | y <sup>3+</sup> | y <sup>4+</sup> | y <sup>5+</sup> | y <sup>6+</sup> | y <sup>7+</sup> | y <sup>8+</sup> | y <sup>9+</sup> | y <sup>10+</sup> | y <sup>11+</sup> | #             |    |
|----|-----------------|-----------------|-----------------|-----------------|-----------------|-----------------|-----------------|-----------------|-----------------|------------------|------------------|------------------|-----|-----------------|-----------------|-----------------|-----------------|-----------------|-----------------|-----------------|-----------------|-----------------|------------------|------------------|---------------|----|
| 1  |                 | 35.78           | 40.03           |                 | 47.37           | 53.04           |                 | 70.54           | 79.06           |                  | 140.08           | 157.11           | R   | 501.28          | 501.52          | 505.78          | <b>668.03</b>   | <b>668.36</b>   | 674.04          | 1001.55         | 1002.04         | 1010.55         | 2002.08          | 2003.07          | 2020.09       | M  |
| 2  | 124.58          | 124.83          | 129.08          | <b>165.77</b>   | 166.1           | 171.78          | <b>248.16</b>   | <b>248.65</b>   | <b>257.16</b>   | <b>495.3</b>     | <b>496.29</b>    | <b>513.31</b>    | D   | <b>462.25</b>   | <b>462.5</b>    | 466.75          | 616             | 616.33          | 622             | 923.49          | 923.99          | 932.5           | 1845.98          | 1846.97          | 1863.99       | 16 |
| 3  | 138.84          | 139.08          | 143.34          | <b>184.78</b>   | 185.11          | 190.78          | <b>276.67</b>   | <b>277.16</b>   | 285.67          | 552.33           | <b>553.31</b>    | 570.34           | G   | 373.2           | 373.45          | 377.7           | <b>497.26</b>   | <b>497.59</b>   | 503.27          | <b>745.39</b>   | <b>745.88</b>   | <b>754.4</b>    | 1489.78          | 1490.76          | 1507.79       | 15 |
| 4  | 163.6           | 163.85          | 168.11          | 217.8           | 218.13          | 223.81          | <b>326.2</b>    | <b>326.69</b>   | <b>335.21</b>   | 651.39           | <b>652.38</b>    | <b>669.4</b>     | V   | 358.94          | 359.19          | 363.45          | <b>478.26</b>   | <b>478.58</b>   | <b>484.26</b>   | 716.88          | 717.37          | 725.89          | 1432.75          | 1433.74          | 1450.76       | 14 |
| 5  | 192.36          | 192.61          | 196.86          | 256.15          | 256.47          | 262.15          | <b>383.71</b>   | <b>384.21</b>   | <b>392.72</b>   | 766.42           | <b>767.4</b>     | <b>784.43</b>    | D   | 334.18          | 334.42          | 338.68          | <b>445.23</b>   | <b>445.56</b>   | <b>451.24</b>   | <b>667.35</b>   | <b>667.84</b>   | <b>676.35</b>   | 1333.69          | 1334.67          | 1351.7        | 13 |
| 6  | 214.12          | 214.36          | 218.62          | 285.16          | 285.48          | 291.16          | <b>427.23</b>   | <b>427.72</b>   | <b>436.24</b>   | 853.45           | 854.44           | 871.46           | S   | 305.42          | 305.67          | 309.92          | <b>406.89</b>   | <b>407.22</b>   | <b>412.89</b>   | <b>609.83</b>   | <b>610.33</b>   | <b>618.84</b>   | 1218.66          | 1219.64          | 1236.67       | 12 |
| 7  | 235.88          | 236.12          | 240.38          | 314.17          | 314.49          | 320.17          | <b>470.75</b>   | 471.24          | <b>479.75</b>   | 940.48           | 941.47           | 958.5            | S   | 283.66          | 283.91          | 288.16          | <b>377.88</b>   | <b>378.21</b>   | <b>383.88</b>   | <b>586.32</b>   | <b>586.81</b>   | <b>575.32</b>   | 1131.63          | 1132.61          | 1149.64       | 11 |
| 8  | 250.13          | 250.38          | 254.63          | 333.17          | 333.5           | 339.18          | <b>499.26</b>   | 499.75          | 508.26          | 997.51           | 998.49           | 1015.52          | G   | 261.9           | 262.15          | 266.41          | <b>348.87</b>   | <b>349.2</b>    | 354.87          | <b>522.8</b>    | <b>523.29</b>   | <b>531.81</b>   | 1044.59          | 1045.58          | 1062.61       | 10 |
| 9  | 289.16          | 289.4           | 293.66          | <b>385.21</b>   | <b>385.54</b>   | <b>391.21</b>   | <b>577.31</b>   | <b>577.8</b>    | <b>586.31</b>   | 1153.61          | 1154.59          | 1171.62          | R   | 247.65          | 247.89          | 252.15          | 329.86          | 330.19          | <b>335.87</b>   | <b>494.29</b>   | <b>494.78</b>   | 503.3           | 987.57           | 988.56           | 1005.58       | 9  |
| 10 | <b>321.18</b>   | <b>321.43</b>   | 325.68          | <b>427.91</b>   | <b>428.23</b>   | <b>433.91</b>   | <b>641.35</b>   | <b>641.85</b>   | <b>650.36</b>   | 1281.7           | 1282.69          | 1299.71          | K   | 208.62          | 208.87          | <b>213.13</b>   | <b>277.83</b>   | 278.16          | 283.83          | <b>416.24</b>   | <b>416.73</b>   | 425.25          | 831.47           | 832.46           | 849.48        | 8  |
| 11 | 345.44          | 345.69          | <b>349.95</b>   | <b>480.26</b>   | <b>480.58</b>   | 466.26          | 689.88          | 690.37          | 698.89          | 1378.75          | 1379.74          | 1396.77          | P   | 176.6           | 176.85          | 181.1           | 235.13          | 235.46          | 241.13          | 352.19          | 352.68          | <b>361.2</b>    | 703.38           | 704.36           | <b>721.39</b> | 7  |
| 12 | 370.71          | 370.95          | <b>375.21</b>   | <b>493.94</b>   | <b>494.27</b>   | 499.94          | 740.4           | 740.9           | 749.41          | 1479.8           | 1480.79          | 1497.81          | T   | 152.34          | 152.58          | 156.84          | 202.78          | 203.11          | 208.78          | 303.67          | 304.16          | <b>312.67</b>   | 606.32           | 607.31           | <b>624.34</b> | 6  |
| 13 | <b>384.96</b>   | <b>385.21</b>   | 389.46          | <b>512.95</b>   | <b>513.27</b>   | <b>518.95</b>   | <b>768.92</b>   | 769.41          | 777.92          | 1536.82          | 1537.81          | 1554.83          | G   | 127.07          | 127.32          | 131.58          | 169.1           | 169.43          | 175.1           | 253.14          | 253.63          | 262.15          | 505.28           | 506.26           | <b>523.29</b> | 5  |
| 14 | <b>416.99</b>   | <b>417.23</b>   | <b>421.49</b>   | <b>555.64</b>   | <b>555.97</b>   | <b>561.65</b>   | 832.96          | 833.46          | <b>841.97</b>   | 1664.92          | 1665.9           | 1682.93          | K   | 112.82          | 113.07          | 117.32          | 150.09          | 150.42          | 156.09          | 224.63          | 225.12          | 233.64          | 448.26           | <b>449.24</b>    | 466.27        | 4  |
| 15 | 431.24          | 431.49          | <b>435.74</b>   | <b>574.65</b>   | <b>574.98</b>   | <b>580.66</b>   | 861.47          | 861.97          | 870.48          | 1721.94          | 1722.92          | 1739.95          | G   | 80.8            |                 | 85.3            | 107.39          |                 | 113.4           | 160.58          |                 | 169.59          | 320.16           |                  | 338.17        | 3  |
| 16 | <b>456.01</b>   | <b>456.25</b>   | <b>460.51</b>   | <b>607.67</b>   | <b>608</b>      | <b>613.68</b>   | 911.01          | 911.5           | 920.01          | 1821.01          | 1821.99          | 1839.02          | V   | 66.54           |                 | 71.04           | 88.38           |                 | 94.39           | 132.07          |                 | 141.08          | 263.14           |                  | 281.15        | 2  |
|    |                 |                 |                 |                 |                 |                 |                 |                 |                 |                  |                  |                  | Y   | 41.77           |                 | 46.28           | 55.36           |                 | 61.37           | 82.54           |                 | 91.54           | 164.07           |                  | <b>182.08</b> | 1  |

chainB :

| # | b <sup>1+</sup> | b <sup>2+</sup> | b <sup>3+</sup> | b <sup>4+</sup> | b <sup>5+</sup> | b <sup>6+</sup> | b <sup>7+</sup> | b <sup>8+</sup> | b <sup>9+</sup> | b <sup>10+</sup> | b <sup>11+</sup> | b <sup>12+</sup> | seq | y <sup>1+</sup> | y <sup>2+</sup> | y <sup>3+</sup> | y <sup>4+</sup> | y <sup>5+</sup> | y <sup>6+</sup> | y <sup>7+</sup> | y <sup>8+</sup> | y <sup>9+</sup> | y <sup>10+</sup> | y <sup>11+</sup> | #     |   |
|---|-----------------|-----------------|-----------------|-----------------|-----------------|-----------------|-----------------|-----------------|-----------------|------------------|------------------|------------------|-----|-----------------|-----------------|-----------------|-----------------|-----------------|-----------------|-----------------|-----------------|-----------------|------------------|------------------|-------|---|
| 1 | 468.5           | 468.75          | 473.01          | <b>624.33</b>   | <b>624.66</b>   | 630.34          | 936             | 936.49          | 945             | 1870.99          | 1871.97          | 1889             | K   |                 |                 |                 |                 |                 |                 |                 |                 |                 |                  |                  |       |   |
|   |                 |                 |                 |                 |                 |                 |                 |                 |                 |                  |                  |                  | L   | 29.28           |                 | 33.78           | 38.7            |                 | 44.71           | 57.55           |                 | 66.55           | 114.09           |                  | 132.1 | 1 |

Mass of detected product ions are shown in red. Precursor ion charges, score values by MassMatrix (score, pp, pp2, and pptag), m/z of precursor ions, observed molecular weight of the peptides, theoretical molecular weight of the peptide, delta = MW(obs) - MW, and peptide sequence are also shown. Pair of residues that have the same label (\$1 or \$2) are predicted to be cross-linked.

**Table S8:** The lists of detected product ions derived from peptides that were predicted to be cross-linked between PsbP and CP26

Index scan# charge score pp pp<sub>2</sub> pp<sub>tag</sub> m/z MW(obs) MW delta miss Unique sequence + modifications  
[1459\\_1088](#) +3 36 8.4 10.0 7.5 1121.8658 3363.5830 3363.6103 -0.0273 2 ✓ E(\$1)SSTPVVDGKQYY\_FKGAK(\$1)K(\$2)F\_GANCGPE(\$2)AVW + CaAK(17)

chainA :

| #  | b <sup>+8</sup> | b <sup>+9</sup> | b <sup>+8</sup> | b <sup>+9</sup> | b <sup>+10</sup> | b <sup>+11</sup> | b <sup>+12</sup> | b <sup>+13</sup> | b <sup>+14</sup> | seq | y <sup>+8</sup> | y <sup>+9</sup> | y <sup>+8</sup> | y <sup>+9</sup> | y <sup>+10</sup> | y <sup>+11</sup> | y <sup>+12</sup> | y <sup>+13</sup> | y <sup>+14</sup> | #         |
|----|-----------------|-----------------|-----------------|-----------------|------------------|------------------|------------------|------------------|------------------|-----|-----------------|-----------------|-----------------|-----------------|------------------|------------------|------------------|------------------|------------------|-----------|
| 1  | 668.32          | 668.65          | 674.33          | <b>1002</b>     | <b>1002.5</b>    | <b>1011</b>      | 2003             | 2003.9           | 2021             | E   | 1115.9          | 1116.2          | 1121.9          | 1673.3          | 1673.8           | 1682.3           | 3345.6           | 3346.6           | 3363.6           | <b>M</b>  |
| 2  | 697.34          | 697.66          | 703.34          | <b>1045.5</b>   | <b>1046</b>      | <b>1054.5</b>    | 2090             | 2091             | 2108             | S   | 442.55          | 442.88          | 448.55          | 663.32          | 663.81           | 672.33           | <b>1325.6</b>    | <b>1326.6</b>    | <b>1343.7</b>    | <b>12</b> |
| 3  | 726.35          | 726.67          | 732.35          | <b>1089</b>     | <b>1089.5</b>    | <b>1098</b>      | 2177             | 2178             | 2195             | S   | 413.54          | 413.87          | 419.54          | 619.81          | 620.3            | 628.81           | <b>1238.6</b>    | 1239.6           | <b>1256.6</b>    | <b>11</b> |
| 4  | 760.03          | 760.36          | <b>766.03</b>   | <b>1139.5</b>   | <b>1140</b>      | <b>1148.5</b>    | 2278.1           | 2279.1           | 2296.1           | T   | 384.53          | 384.86          | 390.53          | 576.29          | 576.78           | 585.3            | 1151.6           | 1152.6           | <b>1169.6</b>    | <b>10</b> |
| 5  | 792.38          | 792.71          | 798.38          | 1188.1          | 1188.6           | 1197.1           | 2375.1           | 2376.1           | 2393.1           | P   | 350.85          | 351.17          | 356.85          | 525.77          | 526.26           | 534.77           | <b>1050.5</b>    | <b>1051.5</b>    | <b>1068.5</b>    | <b>9</b>  |
| 6  | 825.4           | 825.73          | <b>831.41</b>   | <b>1237.6</b>   | <b>1238.1</b>    | <b>1246.6</b>    | 2474.2           | 2475.2           | 2492.2           | V   | 318.5           | 318.82          | 324.5           | 477.24          | 477.73           | 486.25           | 953.47           | 954.46           | 971.48           | <b>8</b>  |
| 7  | 858.43          | 858.75          | 864.43          | <b>1287.1</b>   | <b>1287.6</b>    | <b>1296.1</b>    | 2573.3           | 2574.2           | 2591.3           | V   | 285.47          | 285.8           | 291.48          | 427.71          | 428.2            | 436.71           | <b>854.4</b>     | <b>855.39</b>    | <b>872.41</b>    | <b>7</b>  |
| 8  | 896.77          | 897.1           | 902.77          | <b>1344.7</b>   | <b>1345.1</b>    | <b>1353.7</b>    | 2688.3           | 2689.3           | 2706.3           | D   | 252.45          | 252.78          | 258.45          | 378.17          | 378.66           | 387.18           | 755.34           | 756.32           | <b>773.35</b>    | <b>6</b>  |
| 9  | 915.77          | 916.1           | 921.78          | <b>1373.2</b>   | <b>1373.7</b>    | <b>1382.2</b>    | 2745.3           | 2746.3           | 2763.3           | G   | 214.11          | 214.44          | 220.11          | 320.66          | 321.15           | 329.66           | 640.31           | 641.29           | <b>658.32</b>    | <b>5</b>  |
| 10 | 958.47          | 958.8           | 964.48          | 1437.2          | 1437.7           | <b>1446.2</b>    | 2873.4           | 2874.4           | 2891.4           | K   | 195.1           | 195.43          | 201.1           | 292.15          | 292.64           | 301.15           | 583.29           | 584.27           | 601.3            | <b>4</b>  |
| 11 | <b>1001.2</b>   | <b>1001.5</b>   | <b>1007.2</b>   | <b>1501.2</b>   | <b>1501.7</b>    | <b>1510.2</b>    | 3001.5           | 3002.5           | 3019.5           | Q   | 152.4           | 152.73          | 158.41          | 228.1           | 228.59           | 237.11           | <b>455.19</b>    | 456.18           | 473.2            | <b>3</b>  |
| 12 | <b>1055.5</b>   | <b>1055.8</b>   | <b>1061.5</b>   | 1582.8          | 1583.3           | <b>1591.8</b>    | 3164.5           | 3165.5           | 3182.5           | Y   | 109.72          |                 | 115.72          | 164.07          |                  | 173.08           | 327.13           |                  | 345.14           | <b>2</b>  |
|    |                 |                 |                 |                 |                  |                  |                  |                  |                  | Y   | 55.36           |                 | 61.37           | 82.54           |                  | 91.54            | 164.07           |                  | 182.08           | <b>1</b>  |

chainB :

| # | b <sup>+8</sup> | b <sup>+9</sup> | b <sup>+8</sup> | b <sup>+9</sup> | b <sup>+10</sup> | b <sup>+11</sup> | b <sup>+12</sup> | b <sup>+13</sup> | b <sup>+14</sup> | seq | y <sup>+8</sup> | y <sup>+9</sup> | y <sup>+8</sup> | y <sup>+9</sup> | y <sup>+10</sup> | y <sup>+11</sup> | y <sup>+12</sup> | y <sup>+13</sup> | y <sup>+14</sup> | #        |
|---|-----------------|-----------------|-----------------|-----------------|------------------|------------------|------------------|------------------|------------------|-----|-----------------|-----------------|-----------------|-----------------|------------------|------------------|------------------|------------------|------------------|----------|
| 1 |                 |                 | 50.03           |                 |                  | 74.54            |                  |                  | 148.08           | F   |                 |                 |                 |                 |                  |                  |                  |                  |                  |          |
| 2 |                 |                 | 107.06          |                 |                  | 160.09           |                  |                  | 319.18           | K   | 1066.9          | 1067.2          | 1072.9          | 1599.8          | 1600.3           | 1608.8           | 3198.5           | 3199.5           | 3216.5           | <b>6</b> |
| 3 |                 |                 | 126.07          |                 |                  | 188.6            |                  |                  | 376.2            | G   | <b>1009.8</b>   | 1010.1          | <b>1015.8</b>   | 1514.2          | 1514.7           | 1523.2           | 3027.4           | 3028.4           | 3045.4           | <b>5</b> |
| 4 |                 |                 | 149.75          |                 |                  | 224.12           |                  |                  | 447.24           | A   | 990.81          | 991.14          | <b>996.81</b>   | 1485.7          | 1486.2           | <b>1494.7</b>    | 2970.4           | 2971.4           | 2988.4           | <b>4</b> |
| 5 | 671             | 671.33          | 677.01          | <b>1006</b>     | <b>1006.5</b>    | <b>1015</b>      | 2011             | 2012             | 2029             | K   | 967.13          | 967.46          | 973.13          | 1450.2          | 1450.7           | 1459.2           | 2899.4           | 2900.4           | 2917.4           | <b>3</b> |
| 6 | <b>1060.9</b>   | <b>1061.2</b>   | 1066.9          | 1590.8          | <b>1591.3</b>    | 1599.8           | 3180.5           | 3181.5           | 3198.5           | K   | 439.87          | 440.2           | 445.88          | 659.31          | 659.8            | 668.31           | 1317.6           | 1318.6           | <b>1335.6</b>    | <b>2</b> |
|   |                 |                 |                 |                 |                  |                  |                  |                  |                  | F   | 50.03           |                 | 56.03           | 74.54           |                  | 83.55            | 148.08           |                  | 166.09           | <b>1</b> |

chainC :

| # | b <sup>+8</sup> | b <sup>+9</sup> | b <sup>+8</sup> | b <sup>+9</sup> | b <sup>+10</sup> | b <sup>+11</sup> | b <sup>+12</sup> | b <sup>+13</sup> | b <sup>+14</sup> | seq | y <sup>+8</sup> | y <sup>+9</sup> | y <sup>+8</sup> | y <sup>+9</sup> | y <sup>+10</sup> | y <sup>+11</sup> | y <sup>+12</sup> | y <sup>+13</sup> | y <sup>+14</sup> | #        |
|---|-----------------|-----------------|-----------------|-----------------|------------------|------------------|------------------|------------------|------------------|-----|-----------------|-----------------|-----------------|-----------------|------------------|------------------|------------------|------------------|------------------|----------|
| 1 |                 |                 | 20.01           |                 |                  | 29.52            |                  |                  | 58.03            | G   |                 |                 |                 |                 |                  |                  |                  |                  |                  |          |
| 2 |                 |                 | 43.69           |                 |                  | 65.04            |                  |                  | 129.07           | A   | 1096.9          | 1097.2          | <b>1102.9</b>   | 1644.8          | 1645.3           | 1653.8           | 3288.6           | 3289.6           | 3306.6           | <b>9</b> |
| 3 |                 | 76.03           | 81.71           |                 | 113.54           | 122.06           |                  | 226.08           | 243.11           | N   | 1073.2          | 1073.5          | <b>1079.2</b>   | 1609.3          | 1609.8           | 1618.3           | 3217.5           | 3218.5           | 3235.6           | <b>8</b> |
| 4 |                 | 129.38          | 135.05          |                 | 193.56           | 202.07           |                  | 386.11           | 403.14           | C   | 1035.2          | 1035.5          | <b>1041.2</b>   | 1552.3          | 1552.7           | 1561.3           | 3103.5           | 3104.5           | 3121.5           | <b>7</b> |
| 5 |                 | 148.38          | 154.06          |                 | 222.07           | 230.58           |                  | 443.13           | 460.16           | G   | 981.83          | 982.16          | <b>987.83</b>   | <b>1472.2</b>   | <b>1472.7</b>    | <b>1481.2</b>    | 2943.5           | 2944.5           | 2961.5           | <b>6</b> |
| 6 |                 | 180.73          | 186.41          |                 | 270.6            | 279.11           |                  | 540.19           | 557.21           | P   | 962.82          | 963.15          | 968.82          | 1443.7          | 1444.2           | 1452.7           | 2886.5           | 2887.4           | 2904.5           | <b>5</b> |
| 7 | 991.14          | 991.47          | <b>997.14</b>   | 1486.2          | 1486.7           | 1495.2           | 2971.4           | 2972.4           | 2989.4           | E   | 930.47          | 930.8           | 936.47          | 1395.2          | 1395.7           | 1404.2           | 2789.4           | 2790.4           | 2807.4           | <b>4</b> |
| 8 | <b>1014.8</b>   | <b>1015.2</b>   | 1020.8          | 1521.7          | 1522.2           | 1530.7           | 3042.4           | 3043.4           | 3060.5           | A   | 119.74          |                 | 125.74          | 179.1           |                  | 188.1            | 357.19           |                  | 375.2            | <b>3</b> |
| 9 | <b>1047.8</b>   | <b>1048.2</b>   | <b>1053.8</b>   | 1571.3          | 1571.8           | 1580.3           | 3141.5           | 3142.5           | 3159.5           | V   | 96.06           |                 | 102.06          | 143.58          |                  | 152.59           | 286.16           |                  | 304.17           | <b>2</b> |
|   |                 |                 |                 |                 |                  |                  |                  |                  |                  | W   | 63.03           |                 | 69.04           | 94.05           |                  | 103.05           | 187.09           |                  | 205.1            | <b>1</b> |

Mass of detected product ions are shown in red. Precursor ion charges, score values by MassMatrix (score, pp, pp<sub>2</sub>, and pp<sub>tag</sub>), m/z of precursor ions, observed molecular weight of the peptides, theoretical molecular weight of the peptide, delta = MW(obs) - MW, and peptide sequence are also shown. Pair of residues that have the same label (\$1 or \$2) are predicted to be cross-linked.
